# Supplementary material for: Studying the Impact of Different Field Environmental Conditions on Seed Quality of Quinoa: The Case of Three Different Years Changing Seed Nutritional Traits in Southern Europe
Source: PubMed Central journal article supplement (PMC8149766; doi:10.3389/fpls.2021.649132), 2021-05-12
Supplement: Data_Sheet_1.pdf [file Data_Sheet_1.pdf]

*Supplementary Table 1. Climatological parameters. Monthly average temperature and water supply in the experimental field of Zamadueñas (Spain) during the growing seasons of 2017, 2018 and 2019.*

| <b>Year</b> |                   | <b>Month</b> | <b>Minimum<br/>temperature<br/>(°C)</b> | <b>Maximum<br/>temperature<br/>(°C)</b> | <b>Mean<br/>temperature<br/>(°C)</b> | <b>Total<br/>precipitations<br/>(mm)</b> | <b>Total<br/>irrigation<br/>(l/m<sup>2</sup>)</b> | <b>Total<br/>water received</b> |
|-------------|-------------------|--------------|-----------------------------------------|-----------------------------------------|--------------------------------------|------------------------------------------|---------------------------------------------------|---------------------------------|
| <b>2017</b> | <b>05/04/2017</b> | April        | 3.83                                    | 21.07                                   | 12.58                                | 3.80                                     | 81.00                                             | 84.80                           |
|             |                   | May          | 9.02                                    | 24.49                                   | 16.69                                | 42.00                                    | 102.00                                            | 144.00                          |
|             |                   | June         | 13.69                                   | 31.35                                   | 22.43                                | 5.40                                     | 102.00                                            | 107.40                          |
|             |                   | July         | 13.47                                   | 31.02                                   | 22.43                                | 33.20                                    | 48.00                                             | 81.20                           |
|             |                   | August       | 13.35                                   | 30.64                                   | 21.84                                | 13.60                                    | -                                                 | 13.60                           |
|             |                   | <b>total</b> |                                         |                                         |                                      |                                          | 98.00                                             | 333.00                          |
| <b>2018</b> | <b>18/06/2018</b> | June         | 12.09                                   | 25.20                                   | 18.24                                | 70.60                                    | 30.90                                             | 101.50                          |
|             |                   | July         | 13.10                                   | 31.46                                   | 21.95                                | 22.20                                    | 98.40                                             | 120.60                          |
|             |                   | August       | 13.61                                   | 31.88                                   | 22.48                                | 0.00                                     | 108.00                                            | 108.00                          |
|             |                   | September    | 12.60                                   | 29.18                                   | 20.33                                | 28.00                                    | 39.00                                             | 67.00                           |
|             |                   | October      | 5.89                                    | 19.75                                   | 12.11                                | 19.81                                    | -                                                 | 19.81                           |
|             |                   | <b>total</b> |                                         |                                         |                                      |                                          | 140.61                                            | 276.30                          |
| <b>2019</b> | <b>03/05/2019</b> | May          | 6.00                                    | 22.64                                   | 14.40                                | 7.00                                     | 62.50                                             | 69.50                           |
|             |                   | June         | 10.13                                   | 28.03                                   | 19.28                                | 6.00                                     | 63.96                                             | 69.96                           |
|             |                   | July         | 14.64                                   | 31.83                                   | 22.88                                | 29.80                                    | 72.00                                             | 101.80                          |
|             |                   | August       | 13.54                                   | 30.39                                   | 21.80                                | 21.80                                    | 18.00                                             | 39.80                           |
|             |                   | September    | 10.85                                   | 25.37                                   | 17.47                                | 23.60                                    | -                                                 | 23.60                           |
|             |                   | <b>total</b> |                                         |                                         |                                      |                                          | 88.20                                             | 216.46                          |

*Supplementary Table 2.* Soil analysis. A soil characterization was performed each year (2017, 2018, and 2019) in the cultivation area.

| Year | Clay % | Sand % | Silt % | Soil texture    | pH in water (1:5) |           | Soil electrical conductivity (EC) $\mu\text{S}/\text{cm}$ |           | K $\text{mg K}_2\text{O}/\text{g}$ |           | Organic mater % |           | P $\text{mg P}_2\text{O}_5/\text{Kg}$ |           | N %   |           |
|------|--------|--------|--------|-----------------|-------------------|-----------|-----------------------------------------------------------|-----------|------------------------------------|-----------|-----------------|-----------|---------------------------------------|-----------|-------|-----------|
|      |        |        |        |                 | Mean              | Stand Dev | Mean                                                      | Stand Dev | Mean                               | Stand Dev | Mean            | Stand Dev | Mean                                  | Stand Dev | Mean  | Stand Dev |
| 2017 | 15     | 47     | 38     | clay-silty-loam | 8.58              | 0.29      | 0.083                                                     | 0.036     | 0.334                              | 0.04      | 2.03            | 0.26      | 48.04                                 | 5         | 0.075 | 0.015     |
| 2018 | 18     | 38     | 43     | clay-silty-loam | 8.15              | 0.29      | 0.053                                                     | 0.013     | 0.419                              | 0.05      | 1.19            | 0.18      | 105.07                                | 11        | 0.068 | 0.014     |
| 2019 | 18     | 38     | 44     | clay-silty-loam | 8.55              | 0.29      | 0.067                                                     | 0.013     | 0.472                              | 0.06      | 1.28            | 0.19      | 85.47                                 | 9         | 0.067 | 0.013     |

*Supplementary Table 3.* Two-way ANOVA for different quinoa seed qualitative traits from 6 cultivars harvested in three years.

| Variable                | Year<br>(F value)   | Cultivar<br>(F value) | Year x Cultivar<br>interaction<br>(F value) |
|-------------------------|---------------------|-----------------------|---------------------------------------------|
| Seed Weight             | 15.966**            | 13.822**              | 2.281*                                      |
| Seed Area               | 20.608**            | 56.071**              | 11.020**                                    |
| Germination rate        | 118.105**           | 10.358**              | 13.942**                                    |
| Viable seed rate        | 353.223**           | 13.499**              | 16.924**                                    |
| Saponin content         | 20.845**            | 27.430**              | 3.392 <sup>ns</sup>                         |
| Protein Content         | 44.559**            | 6.710**               | 2.146*                                      |
| P content               | 83.658**            | 21.678**              | 13.262**                                    |
| K content               | 143.974**           | 10.314**              | 2.608*                                      |
| Ca content              | 4.899*              | 3.069*                | 3.193**                                     |
| Mg content              | 5.779**             | 5.471**               | 1.929 <sup>ns</sup>                         |
| Na content              | 0.892 <sup>ns</sup> | 2.332 <sup>ns</sup>   | 1.522 <sup>ns</sup>                         |
| Fe content              | 3.510*              | 5.388**               | 2.063 <sup>ns</sup>                         |
| Cu content              | 5.201*              | 5.205**               | 2.191*                                      |
| Mn content              | 172.248**           | 82.810**              | 36.096**                                    |
| Zn content              | 112.663**           | 3.758**               | 1.075 <sup>ns</sup>                         |
| FRAP value              | 40.289**            | 26.428**              | 2.846*                                      |
| Total phenolic content  | 38.472**            | 8.566**               | 1.062 <sup>ns</sup>                         |
| Total flavonoid content | 39.505**            | 13.238**              | 3.737**                                     |

ns: non significant; \*\* significant at 99% confidence; \*significant at 95% confidence

A

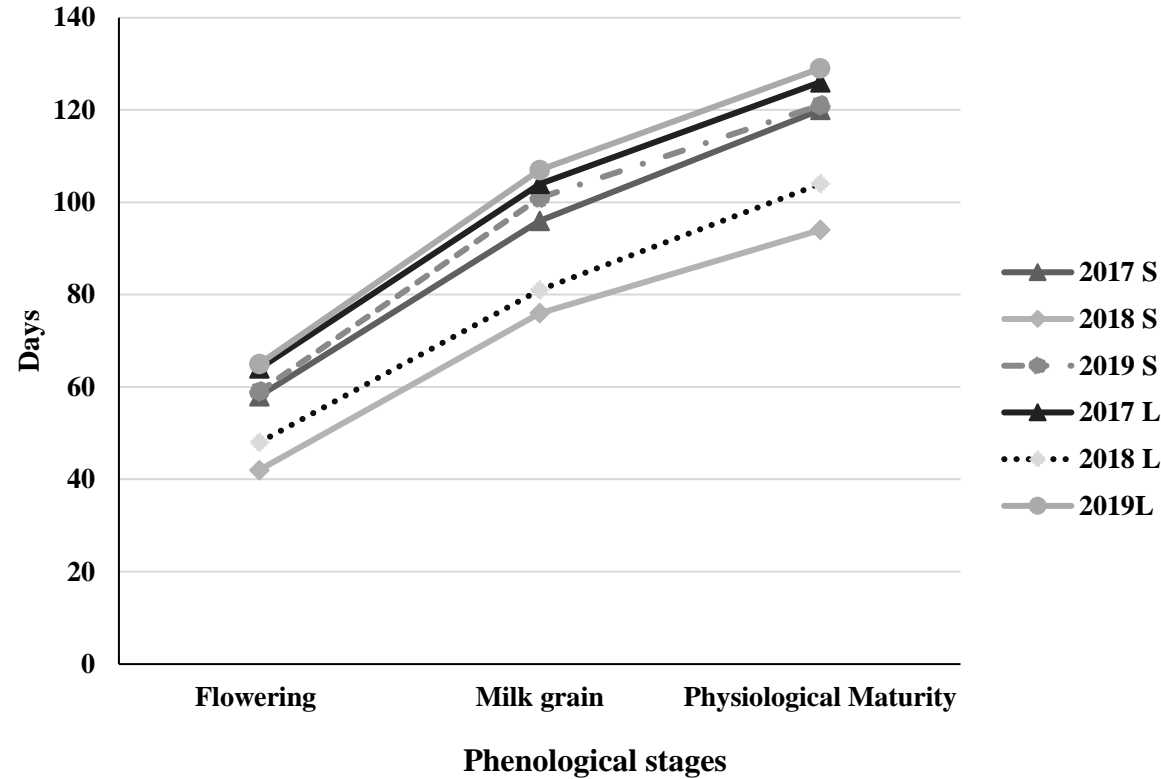

B

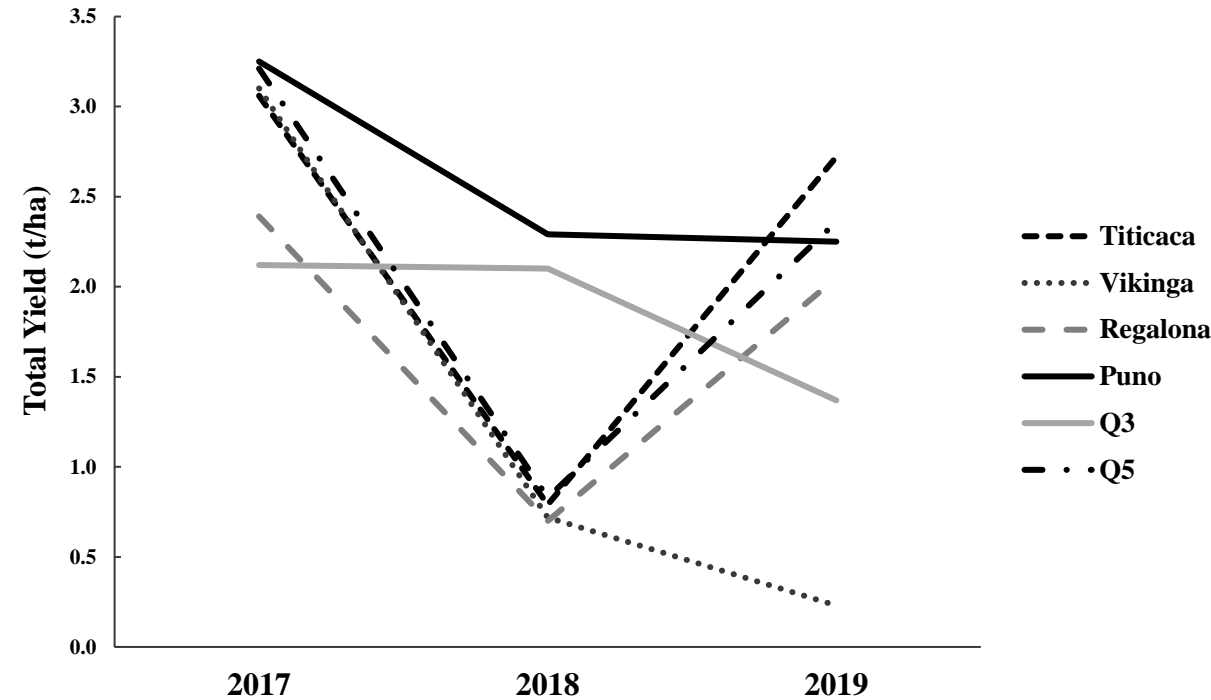

**Supplementary Figure 1. Life span and total seed yield (t/ha) among years and quinoa varieties.** Sowing in 2017 took place on April 5<sup>th</sup> and harvesting on August 8<sup>th</sup>, in 2018 sowing date was June 18<sup>th</sup> and harvesting on October 25<sup>th</sup> and in 2019 sowing took place on May 3<sup>rd</sup> and harvesting on September 20<sup>th</sup>. A) According to the life span of the different varieties, two groups can be distinguished: those with longer life cycles (Vikinga and Q3; L) and those with shorter cycles (Q5, Puno, Titicaca and Regalona; S) B) Total seed yield was determined each year for each variety and is expressed as t/ ha.

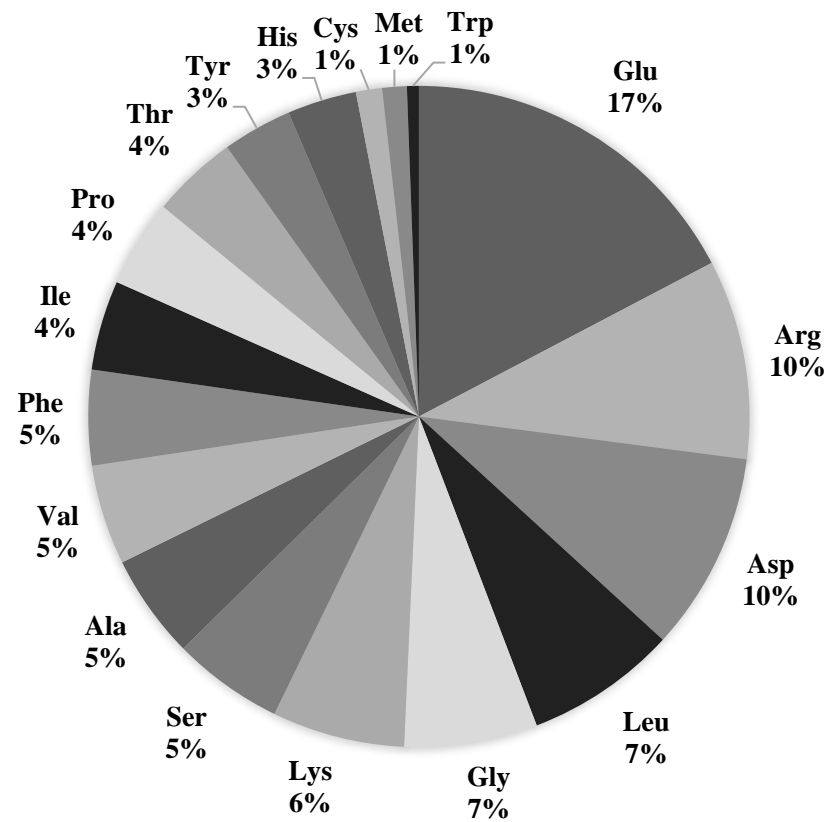

**Supplementary Figure 2.** Amino acid profile as mean values of amino acids in all cultivars and **years** and presented as percentage of crude protein.

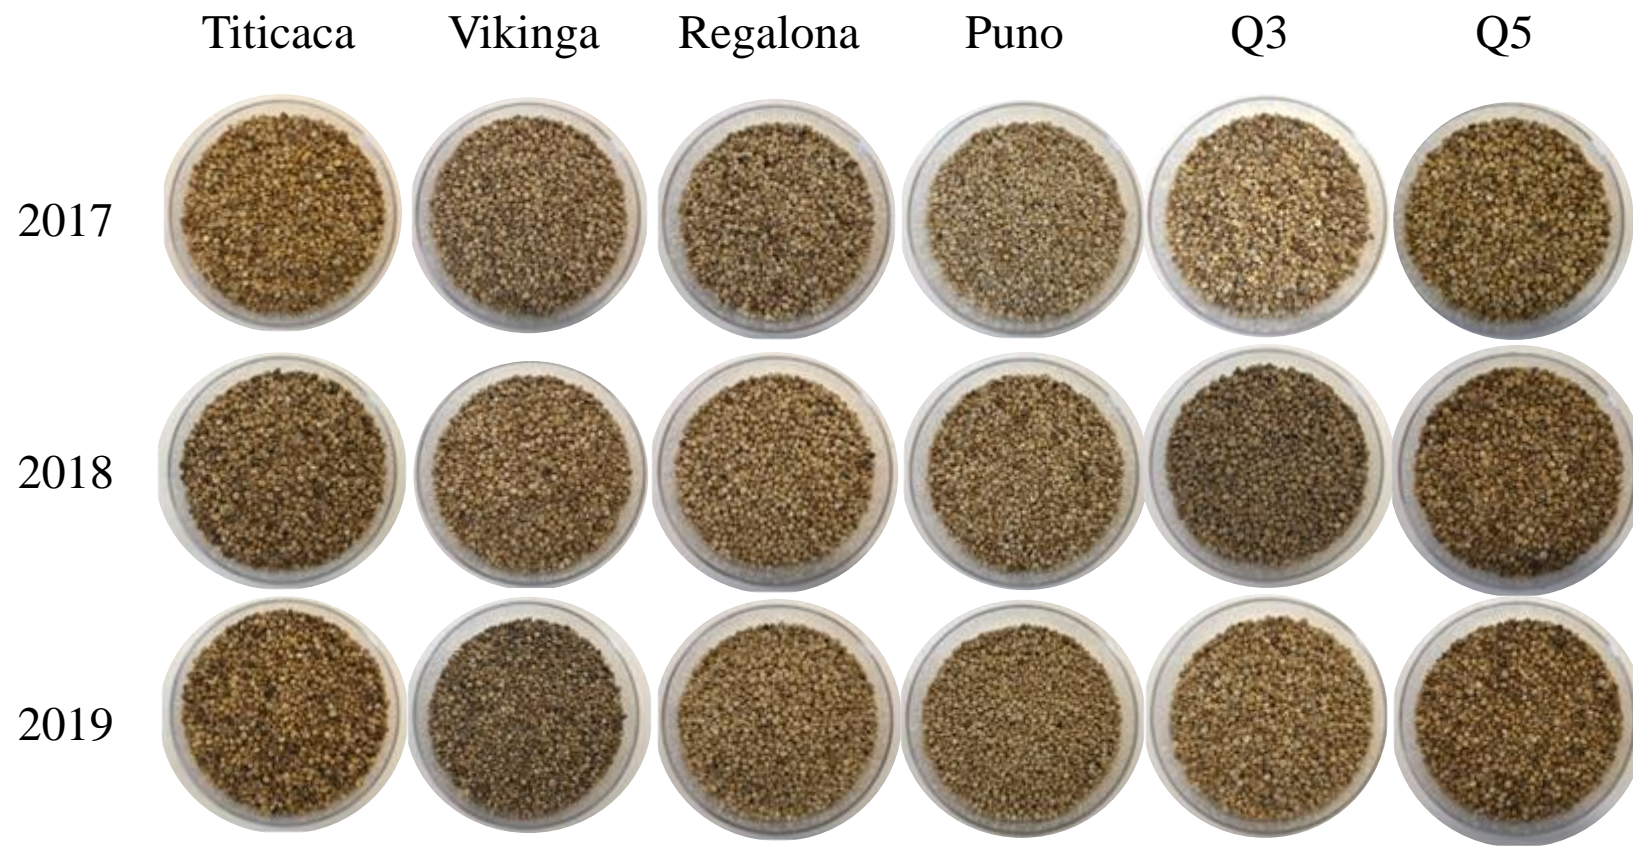

**Supplementary Figure 3.** Pictures of seeds used for color parameter analysis.
